# Supplementary material for: Toughening of poly(ionic liquid)-based ion gels with cellulose nanofibers as a sacrificial network
Source: Royal Society of Chemistry journal article supplement (doi:10.1039/d3sm00112a), 2023-01-01
Supplement: d3sm00112a1.pdf [file d3sm00112a1.pdf]

Electronic Supplementary Information (ESI) for

## Toughening of poly(ionic liquid)-based ion gels with cellulose nanofibers as a sacrificial network

Takaichi Watanabe\*, Emiho Oe, Yuna Mizutani, and Tsutomu Ono

Department of Applied Chemistry, Graduate School of Natural Science, Okayama University, 3-1-1,  
Tsushima-naka, Kita-ku, Okayama, 700-8530, JAPAN

\* Email: wata-t@okayama-u.ac.jp, Phone & Fax: +81-86-251-8072

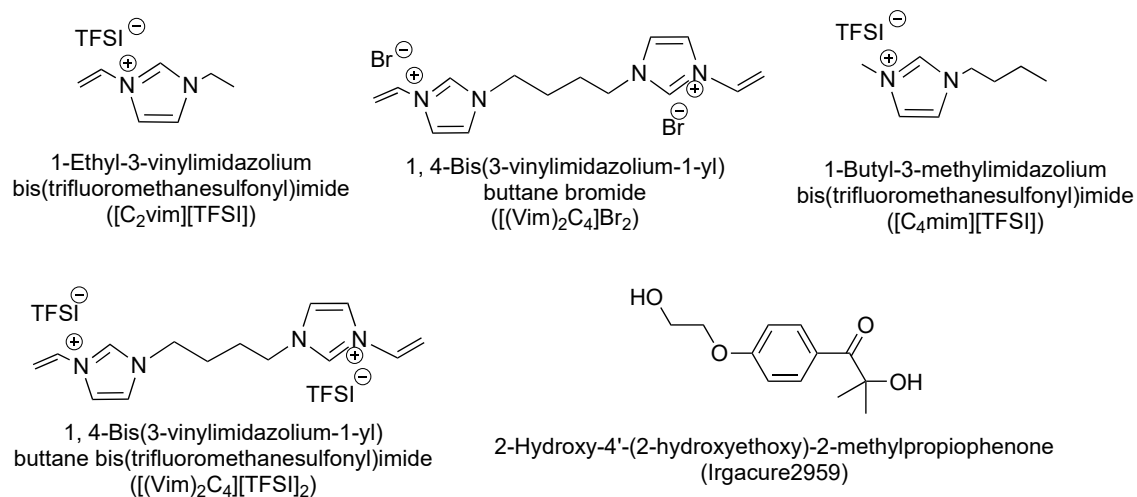

**Fig. S1** Chemical structures of reagents used to prepare PIL ion gels.

**Scheme S1 Synthesis of [(Vim)<sub>2</sub>C<sub>4</sub>]Br<sub>2</sub> and [(Vim)<sub>2</sub>C<sub>4</sub>] [TFSI]<sub>2</sub>.**

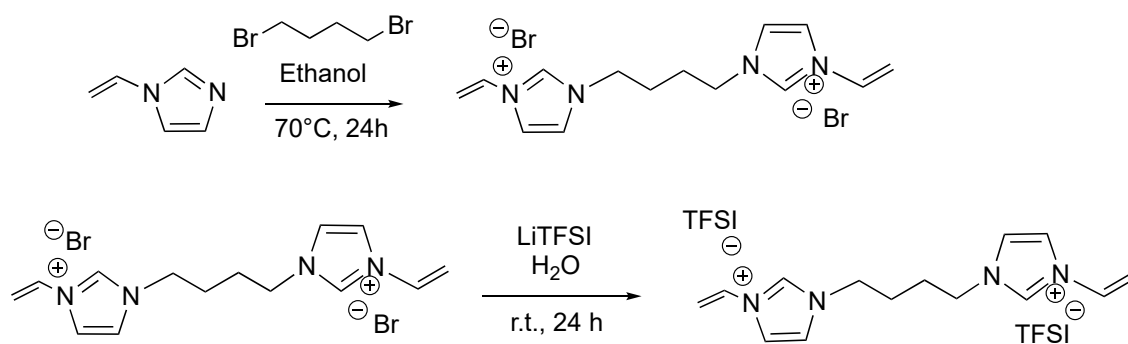

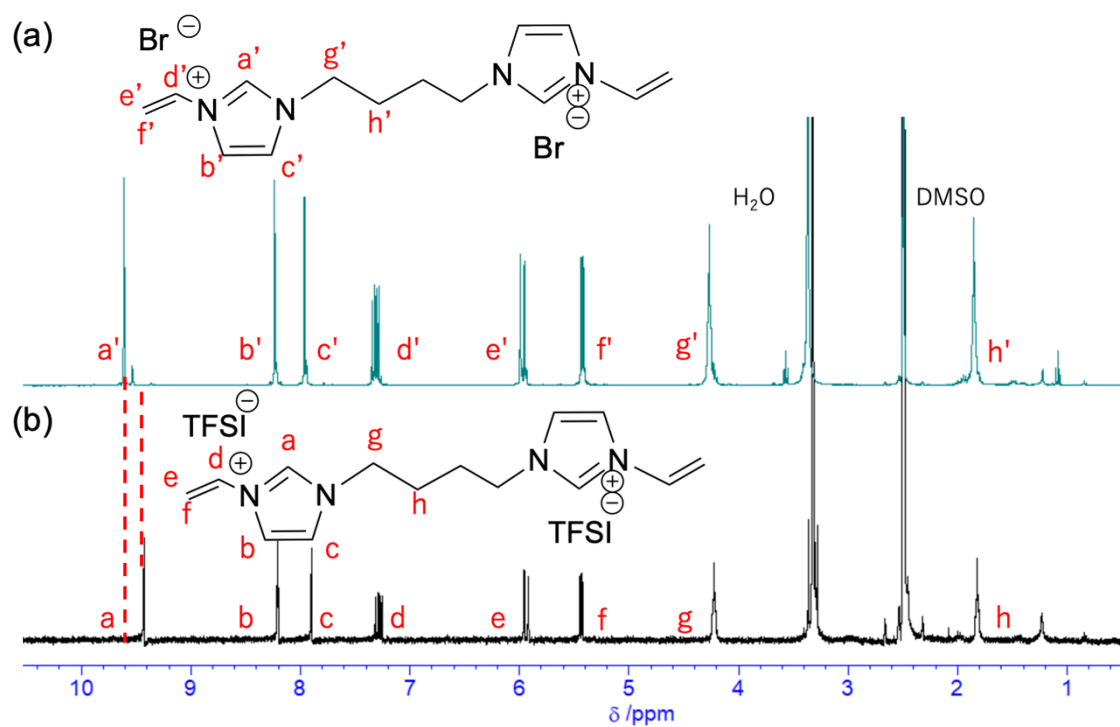

**Fig. S2**  $^1\text{H}$  NMR spectra of (a)  $[(\text{Vim})_2\text{C}_4]\text{Br}_2$  and (b)  $[(\text{Vim})_2\text{C}_4][\text{TFSI}]_2$ . (Solvent:  $\text{DMSO}-d_6$ ).

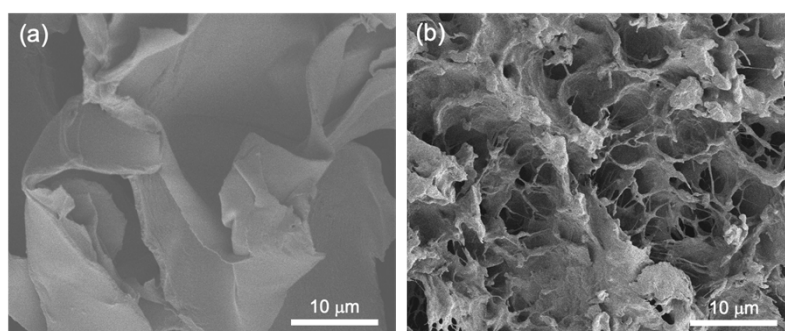

**Fig. S3** Cross-sectional SEM images of lyophilized (a) PIL SN and (b) TOCNF/PIL DN gels. The concentration of TOCNF in the DN gel was 6 wt% relative to the PIL network.
